## Function of Each Lung in Spontaneously Breathing Man Anesthetized with Thiopental-Meperidine

Kai Rehder, M.D.,\* and Alan D. Sessler, M.D.\*

Intrapulmonary gas distribution between individual lungs was studied in five healthy, anesthetized, spontaneously breathing adult volunteers in the supine and both lateral decubitus positions. Thiopental-meperidine anesthesia in spontaneously breathing subjects altered the regional distribution of the FRC/TLC ratio. This was associated with an alteration in intrapulmonary gas distribution; the distribution followed the predicted pattern seen in awake man with voluntarily induced reduction in the FRC/TLC ratio. In eight of ten observations, fractional nonshunted blood flow to the dependent lung decreased in the lateral decubitus positions, contrary to the findings in awake, spontaneously breathing man. The results suggest that thiopental-meperidine anesthesia *per se*, that is, without mechanical ventilation and muscle paralysis, can alter intrapulmonary gas distribution. The mechanism by which general anesthesia with thiopental-meperidine promotes a change in the FRC/TLC ratio remains to be clarified. (Key words: Spontaneous breathing; Thiopental-meperidine anesthesia; Body position; Differential lung function.)

WE PREVIOUSLY REPORTED<sup>1</sup> a study of intrapulmonary gas distribution in man during anesthesia, muscle paralysis, and mechanical ventilation. We found that intrapulmonary gas distribution was more uniform under these conditions than in the conscious state. In another study,<sup>2</sup> we investigated the function of each lung in anesthetized, paralyzed, mechanically ventilated subjects in the supine and lateral positions. In the lateral positions the nondependent lung received a larger fraction of the tidal volume than the dependent lung. This result is contrary to the findings in stud-

ies showing preferential ventilation of the dependent lung in conscious, spontaneously breathing man.<sup>3-5</sup>

Thus far, our studies have not distinguished between the effects of mechanical ventilation with muscle paralysis and the effects of thiopental-meperidine anesthesia. One might consider the possibility that the decrease in FRC that occurs with the induction of general anesthesia might alter the regional FRC/TLC ratios, and that these in turn would be associated with an alteration in intrapulmonary gas distribution. If this were correct, anesthesia alone, that is, without mechanical ventilation and muscle paralysis, should alter gas distribution. Therefore, we decided to study the distribution of inspired gas between the left and right lungs in anesthetized man during spontaneous breathing, thereby eliminating the effects of mechanical ventilation and muscle paralysis.

The results of the study showed preferential ventilation of the nondependent lung in the lateral positions, similar to that observed in anesthetized, paralyzed, mechanically ventilated subjects,<sup>2</sup> and unlike ventilation in awake subjects breathing spontaneously.<sup>4</sup> Thus, it appears that thiopental-meperidine anesthesia alone, without muscle paralysis and mechanical ventilation, can alter intrapulmonary gas distribution. Possible mechanisms are discussed.

### Methods

Five healthy unpremedicated male volunteers † (ages 24-31 years, weights 75-104 kg) were studied. Each was premedicated with scopolamine hydrobromide, 0.43 mg, iv, and

\* Consultant, Department of Anesthesiology, Mayo Clinic; Assistant Professor of Anesthesiology, Mayo Graduate School of Medicine (University of Minnesota); Rochester, Minnesota 55901.

Accepted for publication October 18, 1972. Supported in part by Research Grants HL-12090 and RR-553 from the National Institutes of Health, Public Health Service, and by a grant from the Parker B. Francis Foundation, Kansas City, Missouri.

† Physicians and nurse anesthetists only were permitted to participate in this study. The nature of the study, the manner in which it would be conducted, and its possible risks were outlined in a lengthy interview. Consent to participate was accepted only after the volunteers had had suitable time for consideration.

TABLE 1. Physical Characteristics and Lung Volumes\* (Sitting, Awake)

|           | Physical Characteristics |             |             | Lung Volumes (liters)† |     |     |     |
|-----------|--------------------------|-------------|-------------|------------------------|-----|-----|-----|
|           | Age (Years)              | Height (cm) | Weight (kg) | TLC                    | VC  | FRC | RV  |
| Subject 1 | 31                       | 189         | 91          | 8.0                    | 6.3 | 3.2 | 1.7 |
| Subject 2 | 29                       | 182         | 104         | 5.7                    | 4.7 | 1.7 | 1.0 |
| Subject 3 | 24                       | 178         | 75          | 7.6                    | 5.4 | 3.8 | 2.2 |
| Subject 4 | 25                       | 181         | 83          | 5.9                    | 4.7 | 2.3 | 1.2 |
| Subject 5 | 29                       | 175         | 78          | 6.4                    | 5.1 | 2.6 | 1.3 |
| Mean      | 28                       | 181         | 86          | 6.7                    | 5.2 | 2.7 | 1.5 |

\* Measurements made at body temperature and pressure saturated with water vapor (BTPS) in five male subjects.

† TLC = total lung capacity; VC = vital capacity; FRC = functional residual capacity; RV = residual volume.

then anesthetized with thiopental sodium (average dose, 15.1 mg/kg) and meperidine hydrochloride (average dose, 6.5 mg/kg). Muscle paralysis for intubation and for changes in body position was accomplished with intravenous injections of succinylcholine chloride (average total dose, 150 mg). After the trachea and larynx had been sprayed with 4 per cent lidocaine (Xylocaine), the trachea was intubated with a double-lumen cuffed endotracheal tube (Carlens; resistances of the tube were 5.7 cm H<sub>2</sub>O/l/sec [left side] and 6.2 cm H<sub>2</sub>O/l/sec [right side], at a flow rate of 0.5 l/sec). Following resumption of spontaneous breathing, the subjects were connected to a specially designed multichannel valve (dead-space 18 ml) to permit rapid changes of inspiratory gas mixtures for the two lungs simultaneously.

Inspiratory gas from cylinders containing either 66 per cent oxygen in nitrogen or 100 per cent oxygen flowed through large-bore, corrugated tubes to the multichannel valve and from there through the Carlens tube to the lungs. The gas expired from each lung flowed through the Carlens tube to the multichannel valve and on through heated pneumotachographs (Fleisch, No. 1, Instrumentation Associates, Inc., New York) and large-bore tubings into neoprene bags. Expired gases from each lung were collected separately in neoprene bags, which were evacuated just prior to gas collections. Oxygen uptake, carbon dioxide elimination, minute ventilation, and tidal volume of each lung were deter-

mined from measurement of volumes (gasometer) of expired gas collected over a 10-minute period, from respiratory frequencies, and from oxygen and carbon dioxide concentrations of inspired (FI<sub>O<sub>2</sub></sub> 0.66) and expired gases (duplicate Haldane analyses). Functional residual capacity (FRC) of each lung was calculated from the volumes of expired gas and the concentrations of nitrogen in alveolar and expired gas after 7-minute nitrogen clearance periods. Alveolar nitrogen concentrations prior to nitrogen clearance (FI<sub>O<sub>2</sub></sub> 0.66) were calculated by subtracting from barometric pressure: water vapor tension (P<sub>H<sub>2</sub>O</sub> at body temperature); Pa<sub>CO<sub>2</sub></sub>, and Pa<sub>O<sub>2</sub></sub>, determined by substitution of appropriate values in the alveolar gas equation. Alveolar nitrogen concentrations at the end of the nitrogen clearance periods were determined by nitrogen meters. Expired gases were analyzed for oxygen and carbon dioxide (duplicate Haldane analyses) and expired nitrogen concentrations were calculated from the difference. Expired nitrogen concentrations were corrected for nitrogen contained in inspired gas (<0.5 per cent) and for nitrogen eliminated from blood and tissue. The total correction factor for the nitrogen eliminated from blood and tissue (FI<sub>N<sub>2</sub></sub> 0.34) was assumed to be 0.34/0.80 of that determined by Courmand *et al.*<sup>6</sup> for FI<sub>N<sub>2</sub></sub> 0.80. Correction factors for nitrogen eliminated from blood and tissue through each lung were determined by multiplying the total correction factor with the fractional nonshunted blood flow (fractional oxygen uptake) of each lung.

TABLE 2. Effects of Position on Lung Function\*

| Ventilatory Component                      | No. | Supine Position<br>(Mean $\pm$ SE) | No. | Lateral Decubitus<br>Position†<br>(Mean $\pm$ SE) |
|--------------------------------------------|-----|------------------------------------|-----|---------------------------------------------------|
| Ventilation (l/min, BTPS)                  | 5   | 5.23 $\pm$ 0.51                    | 10  | 5.48 $\pm$ 0.29                                   |
| O <sub>2</sub> uptake (ml/min, STPD)       | 5   | 291 $\pm$ 13                       | 10  | 293 $\pm$ 15                                      |
| CO <sub>2</sub> elimination (ml/min, STPD) | 5   | 191 $\pm$ 10                       | 10  | 192 $\pm$ 5                                       |
| Paco <sub>2</sub> (torr)                   | 4   | 58 $\pm$ 4                         | 9   | 54 $\pm$ 2                                        |
| Pao <sub>2</sub> (torr)                    |     |                                    |     |                                                   |
| F <sub>IO<sub>2</sub></sub> = 0.66         | 4   | 295 $\pm$ 24                       | 9   | 306 $\pm$ 10                                      |
| F <sub>IO<sub>2</sub></sub> = 1.0          | 4   | 490 $\pm$ 23                       | 8   | 501 $\pm$ 10                                      |
| V <sub>D</sub> /V <sub>T</sub> ‡           | 4   | 0.46 $\pm$ 0.02                    | 9   | 0.44 $\pm$ 0.01                                   |
| FRC, anesthetized (liters, BTPS)           | 5   | 2.09 $\pm$ 0.26                    | 10  | 2.43 $\pm$ 0.22                                   |
| Body temperature (C)                       | 5   | 36.8 $\pm$ 0.1                     | 10  | 36.9 $\pm$ 0.1                                    |
| Respiratory frequency (breaths/min)        | 5   | 8.4 $\pm$ 1.6                      | 10  | 8.0 $\pm$ 0.8                                     |
| FRC/TLC‡                                   | 5   | 0.31 $\pm$ 0.03                    | 10  | 0.36 $\pm$ 0.02                                   |
| Lung clearance ratio (LCR)                 | 9   | 2.8 $\pm$ 0.3                      | 9   | 3.2 $\pm$ 0.2                                     |

\* Total measurements = left plus right lung.

† Combined values for left and right lateral decubitus positions.

‡ V<sub>D</sub> = physiologic deadspace; V<sub>T</sub> = tidal volume; FRC = functional residual capacity; TLC = total lung capacity.

TABLE 3. Function of the Right Lung as Percentage of Total: Mean Values and Ranges

| Ventilatory Component       | Position            |                        |                         |
|-----------------------------|---------------------|------------------------|-------------------------|
|                             | Supine              | Left Lateral Decubitus | Right Lateral Decubitus |
| Ventilation                 | 52.1<br>(48.8-56.4) | 56.4<br>(51.7-61.0)    | 44.7*<br>(34.1-51.9)    |
| Nonshunted blood flow       | 51.8<br>(50.2-61.1) | 56.8<br>(46.4-63.1)    | 49.3<br>(41.7-61.1)     |
| CO <sub>2</sub> elimination | 53.5<br>(48.9-57.9) | 59.0<br>(52.4-65.1)    | 44.1*<br>(29.9-54.1)    |
| FRC                         | 56.8<br>(52.3-61.1) | 68.8†<br>(61.4-76.1)   | 43.6*†<br>(37.6-48.8)   |

\* Significant difference ( $P < 0.05$ ) between left and right lateral positions.† Significant difference ( $P < 0.05$ ) between supine and left lateral positions.‡ Significant difference ( $P < 0.05$ ) between supine and right lateral positions.

TABLE 4. Mean of the Differences: Supine Minus Dependent Lung (Per Cent)

| Ventilatory Component       | Mean $\pm$ SE*  |
|-----------------------------|-----------------|
| Ventilation                 | 5.8 $\pm$ 1.9†  |
| Nonshunted blood flow       | 3.7 $\pm$ 1.9   |
| CO <sub>2</sub> elimination | 7.5 $\pm$ 2.6†  |
| FRC                         | 12.6 $\pm$ 1.0† |

\* Number of observations, 10.

† Statistically significant,  $P < 0.025$ .

The cumulative volume of ventilation necessary to reduce end-tidal N<sub>2</sub> concentration to 5 per cent was determined and the ratio of this volume to FRC was designated the "lung clearance ratio."<sup>1</sup>

The relative oxygen uptake of each lung reflects the relative amount of nonshunted blood flow to each lung, since with F<sub>IO<sub>2</sub></sub> 0.66, arterial oxygen tensions were approximately 300 torr and hemoglobin saturation in the arterial blood was likely to have been complete. Since these conditions existed, arterial-venous oxygen content differences across each lung should have been nearly identical, differing only in the amount of oxygen in physical solution. Arterial blood was sampled midway during the 10-minute gas collection period for the oxygen uptake determination (F<sub>IO<sub>2</sub></sub> 0.66) and again at the end of the 7-minute nitrogen clearance period (F<sub>IO<sub>2</sub></sub> 1.0). Arterial blood gas tensions and pH were measured by electrodes at a water-bath temperature of 37 C and corrected to the subjects' rectal temperatures (thermistor).

Total physiologic deadspace (left plus right lung) was calculated by the following equation:

$$V_D = V_{EL} \times \frac{P_{aCO_2} - P_{ECO_{2L}}}{P_{aCO_2}} + V_{ER} \times \frac{P_{aCO_2} - P_{ECO_{2R}}}{P_{aCO_2}}$$

where  $V_{EL}$  and  $V_{ER}$  are expiratory volumes and  $P_{ECO_{2L}}$  and  $P_{ECO_{2R}}$  are mean expired  $CO_2$  tensions of the left and right lungs, respectively. The physiologic deadspace calculated by this equation is equivalent to that obtained by combining the two tidal volumes and using total expiratory volume and mixed  $CO_2$  tension.<sup>7</sup>

A few days prior to the study, total lung capacity (TLC) and its subdivisions were measured spirometrically and FRC was obtained by the helium-dilution technique while the subjects were sitting, awake, and unmedicated.

## Results

The physical characteristics and lung volumes (sitting, awake) of the subjects studied are shown in table 1.

Total mean values (left lung plus right lung) are summarized in table 2. The total values for the left and right lateral decubitus positions have been combined since no consistent difference between mean values was observed. During anesthesia and spontaneous ventilation there was no significant difference between mean values for the supine and lateral decubitus positions.

In the supine position, mean percentages of ventilation ( $\bar{V}$ ), nonshunted blood flow ( $\bar{V}_{O_2}$ ),  $CO_2$  elimination ( $\bar{V}_{CO_2}$ ), and FRC for the right lung were 52.1, 54.8, 53.5, and 56.8 per cent, respectively (table 3). In the left lateral decubitus position, FRC of the right lung (nondependent) was consistently increased; fractional ventilation and  $CO_2$  elimination of the right lung increased in four of five instances; and mean percentages of  $\bar{V}$ ,  $\bar{V}_{O_2}$ ,  $\bar{V}_{CO_2}$ , and FRC for the right lung increased to 56.4, 56.8, 59.0, and 68.8 per cent, respectively. In the right lateral decubitus position, fractional ventilation,  $CO_2$  elimination, and FRC of the right lung (dependent) decreased consistently, and the mean percentages of  $\bar{V}$ ,  $\bar{V}_{O_2}$ ,  $\bar{V}_{CO_2}$ , and FRC decreased to 44.7, 49.3, 44.1, and 43.6 per cent, respectively.

Table 4 shows the means of the differences between the percentage values for lungs in supine and dependent positions (that is, left lung in the supine position minus left lung in the left lateral position and right lung in the supine position minus right lung in the right lateral position). Fractional  $\bar{V}$ ,  $\bar{V}_{CO_2}$ , and FRC of the dependent lung decreased significantly in the lateral position ( $P < 0.025$ ). Fractional  $\bar{V}_{O_2}$  of the dependent lung decreased in eight of ten observations; this difference did not achieve statistical significance.

## Discussion

The effects of thiopental-meperidine anesthesia on intrapulmonary gas distribution have not been clarified; it is still unclear whether the altered gas distribution is caused by mechanical ventilation and muscle paralysis or anesthesia itself. The purpose of this study was to determine the effect of anesthesia apart from that of mechanical ventilation and muscle paralysis.

Kaneko and associates<sup>8</sup> observed that intrapulmonary gas distribution was dependent upon overall lung volume. At overall lung volumes of less than 50 per cent TLC they found that ventilation of the dependent lung was decreased in awake man in the lateral position. This represented an alteration in the intrapulmonary distribution of gas from that observed at lung volumes of more than 50 per cent TLC, at which the nondependent lung received a greater proportion of the inspired gas. Similarly, at overall lung volumes of less than 40 per cent TLC, dependent lung regions were less well ventilated in the supine position, which again represented a change from the observations made at lung volumes greater than 40 per cent TLC. These authors suggested this change in intrapulmonary gas distribution might be due to "airway closure" in the dependent lung or lung regions. To reopen such "closed airways," greater changes in transpulmonary pressures would be necessary, and if changes in transpulmonary pressures were uniform throughout, the dependent

TABLE 5. Mean Values of Total Lung Capacity and Subdivisions for Individual Lungs

| Study                                                                                             | Position  |            |                        |            |                         |            |
|---------------------------------------------------------------------------------------------------|-----------|------------|------------------------|------------|-------------------------|------------|
|                                                                                                   | Supine    |            | Left Lateral Decubitus |            | Right Lateral Decubitus |            |
|                                                                                                   | Left Lung | Right Lung | Left Lung              | Right Lung | Left Lung               | Right Lung |
| Present study (subjects anesthetized and breathing spontaneously)                                 |           |            |                        |            |                         |            |
| FRC (liters)                                                                                      | 0.91      | 1.18       | 0.79                   | 1.71       | 1.32                    | 1.03       |
| TLC (liters)                                                                                      | 2.89      | 3.81       |                        |            |                         |            |
| RV (liters)                                                                                       | 0.64      | 0.84       |                        |            |                         |            |
| RV/TLC                                                                                            | 0.22      | 0.22       |                        |            |                         |            |
| FRC/TLC                                                                                           | 0.31      | 0.31       | 0.27                   | 0.45       | 0.46                    | 0.27       |
| Total FRC/total TLC                                                                               | 0.31      |            | 0.37                   |            | 0.35                    |            |
| Svanberg <sup>2</sup> (subjects awake and breathing spontaneously)                                |           |            |                        |            |                         |            |
| FRC (liters)                                                                                      | 1.39      | 1.69       | 1.38                   | 2.19       | 2.07                    | 1.68       |
| TLC (liters)                                                                                      | 2.83      | 3.43       |                        |            |                         |            |
| RV (liters)                                                                                       | 0.96      | 1.17       |                        |            |                         |            |
| RV/TLC                                                                                            | 0.34      | 0.34       |                        |            |                         |            |
| FRC/TLC                                                                                           | 0.49      | 0.49       | 0.49                   | 0.64       | 0.73                    | 0.49       |
| Total FRC/total TLC                                                                               | 0.49      |            | 0.57                   |            | 0.60                    |            |
| Rehder <i>et al.</i> <sup>2</sup> (subjects anesthetized, paralyzed, and mechanically ventilated) |           |            |                        |            |                         |            |
| FRC (liters)                                                                                      | 1.16      | 1.36       | 1.12                   | 2.29       | 2.21                    | 1.33       |
| TLC (liters)                                                                                      | 3.41      | 3.99       |                        |            |                         |            |
| RV (liters)                                                                                       | 0.97      | 1.13       |                        |            |                         |            |
| RV/TLC                                                                                            | 0.28      | 0.28       |                        |            |                         |            |
| FRC/TLC                                                                                           | 0.34      | 0.34       | 0.33                   | 0.57       | 0.65                    | 0.33       |
| Total FRC/total TLC                                                                               | 0.34      |            | 0.46                   |            | 0.48                    |            |

lung should receive a smaller fraction of the tidal volume. The decrease in FRC (with the accompanying element of "airway closure") which occurs during anesthesia<sup>2,9</sup> and which may encroach upon residual volume<sup>10</sup> might explain the altered intrapulmonary gas distribution.

In order to test this possibility, we tabulated (table 5) the mean values of FRC and of the ratio of FRC/TLC for individual lungs and total lungs, in all three of the body positions examined, for the following subjects: the five of the present study (anesthetized, breathing spontaneously), five other subjects studied earlier in this laboratory<sup>2</sup> (anesthetized, paralyzed, mechanically ventilated), and five subjects studied by Svanberg<sup>2</sup> (awake, breathing

spontaneously).<sup>†</sup> We also tabulated the mean values of TLC, residual volume (RV), and RV/TLC ratio for individual lungs in the supine position. In our calculations we used the values for TLC and RV obtained in the sitting awake subjects and assumed that both remain unchanged in the supine and two lateral positions. This assumption appears to be valid for awake subjects.<sup>11</sup> We further assumed that the fractional distribution of TLC and RV be-

<sup>†</sup> We have used the data from Svanberg for this comparison, since the report of Lillington and associates,<sup>6</sup> which was used in an earlier comparison,<sup>2</sup> did not contain measurements of TLC and hence did not provide data that could be used to check the calculations. Calculations of the FRC/TLC ratios for Lillington and associates' subjects showed similar results.

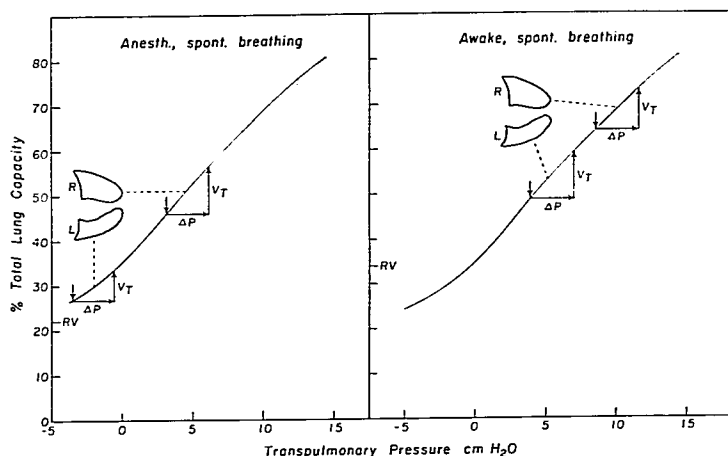

FIG. 1. Pressure-volume curves for both lungs of awake normal subjects in the left lateral decubitus position.<sup>13</sup> *Left*, mean dependent lung volume was 27 per cent and mean nondependent lung volume 45 per cent of TLC in anesthetized subjects breathing spontaneously. Let transpulmonary pressure during inspiration increase uniformly by 3 cm H<sub>2</sub>O, the lung volume change of the nondependent lung is greater than that of the dependent lung (*longer upward arrow*). *Right*, mean dependent lung volume was 49 per cent, mean nondependent lung volume 64 per cent of TLC in awake subjects breathing spontaneously.<sup>3</sup> If transpulmonary pressure again increases uniformly by 3 cm H<sub>2</sub>O, the volume change of the dependent lung is greater than that of the nondependent lung (*longer upward arrow*). (See text for further explanations.)

tween the two lungs equaled that of FRC in the supine position and that, unlike FRC, it remained unchanged in the lateral decubitus position. This assumption for conscious man seems reasonable, considering the results of the study by Svanberg.<sup>3</sup>

It is apparent from table 5 that the total FRC/total TLC ratios in both anesthetized, spontaneously breathing and anesthetized, paralyzed, mechanically ventilated subjects were less than 0.40 in the supine and less than 0.50 in both lateral decubitus positions. In contrast, in awake, spontaneously breathing subjects the ratio exceeded 0.40 in the supine position and exceeded 0.50 in the lateral positions. In order to determine what effect this difference in the FRC/TLC ratio might have on gas distribution between the two lungs in the lateral position, we replotted the mean pressure-volume curve for the total lungs obtained in a study of six awake men in the left lateral decubitus position by Milic-Emili and

associates<sup>12</sup> (fig. 1). Assuming no change in the slope of the pressure-volume curve with anesthesia (an assumption which may, however, be incorrect<sup>10</sup>), and assuming equal lung pressure-volume curves for the dependent and nondependent lungs, one can determine the respective position of each lung on the pressure-volume curve at end-expiration (fig. 1, *downward arrow*). The mean end-expiratory lung volume of the dependent lung in anesthetized, spontaneously breathing subjects (left lateral position) was 27 per cent of TLC; that of the nondependent lung was 45 per cent. Assuming also equal stresses to both lungs (an assumption which may not be valid, particularly during mechanical ventilation<sup>13, 14</sup>) and assuming an increase in transpulmonary pressure of 3 cm H<sub>2</sub>O during inspiration (fig. 1, *horizontal arrow*), this will result in a larger volume change in the nondependent lung (fig. 1, *upward arrow* is longer) than in the dependent lung of the anesthetized subject, pro-

vided similar conditions for the chest wall pre-  
pared for the two hemithoraces. In conscious,  
spontaneously breathing man, the mean end-  
expiratory lung volume of the dependent lung  
was 49 per cent and that of the nondependent  
lung, 64 per cent of TLC in the left lateral  
position.<sup>3</sup> Given the same assumptions, one  
would expect a larger volume change of the de-  
pendent lung (fig. 1, *upward arrow* is longer)  
than of the nondependent lung in the awake  
subject.

The distribution of inspired gas is affected  
not only by the elastic and flow-resistive forces  
but also by stresses applied to the two lungs.  
Thus, gravity acting on the abdominal con-  
tents and on the mediastinum in the lateral  
decubitus position causes the end-expiratory  
lung volume of the dependent lung to be  
smaller than that of the nondependent lung.  
This volumetric difference between the two  
lungs is associated with a more sharply curved,  
high, dependent hemidiaphragm. It has been  
said that this permits the dependent hemidia-  
phragm to contract more effectively during ac-  
tive inspiration. However, this is not the only  
mechanism, because in patients with ipsilat-  
eral diaphragmatic paralysis a larger volume  
of gas ventilating the dependent lung has been  
observed.<sup>15</sup>

The lung clearance ratio (LCR) is indepen-  
dent of changes in FRC and alveolar ventila-  
tion rate, provided these factors change pro-  
portionately. In awake normal man, LCR in-  
creased when the subject was turned from the  
supine to the lateral position.<sup>1</sup> In contrast, in  
this study LCR did not increase significantly  
when the anesthetized subjects were turned.  
This indicates that the efficiency of utilization  
of total ventilation in nitrogen clearance (in-  
cluding  $V_D/V_T$  and uniformity of intrapulmo-  
nary gas distribution) was not changed sig-  
nificantly. This observation agrees with our  
findings in a study of anesthetized, paralyzed,  
mechanically ventilated man,<sup>1</sup> in which LCR  
also remained unchanged when the subjects  
were turned to the lateral position.

Since the hemoglobin of the peripheral ar-  
terial blood was saturated with oxygen, rela-  
tive oxygen uptake of each lung represented  
the relative distribution of the nonshunted  
pulmonary blood flow (see Methods). Con-  
trary to observations relating to conscious hu-

man subjects<sup>6, 15, 16</sup> and to anesthetized, pa-  
ralyzed, mechanically ventilated dogs,<sup>7</sup> our ob-  
servations showed increases in the relative  
oxygen uptake of the dependent lung in only  
two of ten instances.

Recently, Denlinger and associates<sup>17</sup> re-  
ported that the pulmonary capillary blood flow  
was greater to the nondependent lung in five  
of 11 anesthetized, paralyzed, mechanically  
ventilated subjects. These authors ascribed  
the larger nonshunted blood flow to the non-  
dependent lung to preferential collapse of de-  
pendent portions of the lung. Such a hy-  
pothesis seems to be supported by the results  
of a study by Katori and associates<sup>18</sup> in an-  
esthetized dogs; these authors observed sig-  
nificant blood flow to nonventilated alveoli  
(shunted blood flow) in dependent lung re-  
gions while the animals were breathing a gas  
mixture containing 99.6 per cent oxygen. They  
speculated that the dependent small airways  
and alveoli might decrease in size, or even  
completely collapse, so causing underventila-  
tion or nonventilation but perfused alveoli.

Another possible mechanism of altered dis-  
tribution of nonshunted blood flow is reduc-  
tion of end-expiratory lung volume associated  
with the induction of thiopental-meperidine  
anesthesia in subjects in supine and lateral po-  
sitions. This change in lung volume may af-  
fect the pulmonary vascular resistances of the  
two lungs differently. Table 5 indicates that  
the relative volume of the dependent lung dur-  
ing anesthesia (with spontaneous breathing)  
was 27 per cent of its TLC (approximately RV  
in the supine position), whereas the nondepen-  
dent lung volume was approximately 45 per  
cent of its TLC.

Hughes and associates,<sup>19</sup> studying healthy  
subjects sitting erect, demonstrated that the  
proportion of pulmonary blood flow per al-  
veolus to the dependent regions decreased  
after maximal expiration to residual volume.  
At residual volume, apical blood flow ex-  
ceeded basal blood flow, and when the lung  
volume was between RV and FRC, pulmonary  
blood flow per alveolus was uniform through-  
out the lung. These authors attributed the de-  
creased blood flow to the dependent zones at  
low lung volumes to an increase in interstitial  
pressure, which affects the caliber of the ex-  
tra-alveolar vessels. In agreement with these

observations, Reed and Wood<sup>20</sup> have stressed that, in intact dogs, other factors—in addition to pulmonary arterial, pulmonary venous, and alveolar pressures—affect the vertical distribution of pulmonary blood flow. These authors pointed out that the position-dependent changes in blood-gas tensions which they had observed and the related changes in the pH of the pulmonary venous blood draining the dependent lung regions could be expected to be associated with increased tone of the muscles of the blood vessels in the dependent lung and thereby with an increase in the vascular resistance in the dependent lung.

Whatever the mechanism, the alterations in intrapulmonary gas distribution during anesthesia and spontaneous breathing in man are apparently associated with similar directional changes in the distribution of the nonshunted pulmonary blood flow. These similar directional changes in blood and gas flow distribution in the lateral position may tend to minimize the disturbances of pulmonary gas exchange during anesthesia and spontaneous breathing. Although these studies suggest that the reduction of end-expiratory lung volume following induction of anesthesia with thiopental and meperidine is probably a major factor in altering the distribution of intrapulmonary gas between the two lungs, the possible contribution of mechanical ventilation and muscle paralysis cannot be excluded.

### References

1. Rehder K, Hatch DJ, Sessler AD, et al: Effects of general anesthesia, muscle paralysis, and mechanical ventilation on pulmonary nitrogen clearance. *ANESTHESIOLOGY* 35:591-601, 1971
2. Rehder K, Hatch DJ, Sessler AD, et al: The function of each lung of anesthetized and paralyzed man during mechanical ventilation. *ANESTHESIOLOGY* 37:16-26, 1972
3. Svanberg L: Influence of posture on the lung volumes, ventilation, and circulation in normals: A spirometric-bronchospirometric investigation. *Scand J Clin Lab Invest* 9 suppl 25:1-195, 1957
4. Miller RD, Fowler WS, Helmholtz HF Jr: Changes of relative volume and ventilation of the two lungs with change to the lateral decubitus position. *J Lab Clin Med* 47:297-304, 1956
5. Lillington GA, Fowler WS, Miller RD, et al: Nitrogen clearance rates of right and left lungs in different positions. *J Clin Invest* 38:2026-2034, 1959
6. Courmand A, Yarmush IG, Riley RL: Influence of body size on gaseous nitrogen elimination during high oxygen breathing. *Proc Soc Exp Biol Med* 48:280-284, 1941
7. Rehder K, Theye RA, Fowler WS: Function of each lung of dogs during intermittent positive-pressure breathing. *Am J Physiol* 206:1031-1035, 1964
8. Kaneko K, Milic-Emili J, Dolovich MB, et al: Regional distribution of ventilation and perfusion as a function of body position. *J Appl Physiol* 21:767-777, 1966
9. Bergman NA: Distribution of inspired gas during anesthesia and artificial ventilation. *J Appl Physiol* 18:1085-1089, 1963
10. Westbrook PR, Stubbs SE, Hyatt RE: Effects of anesthesia and paralysis on respiratory mechanics (abstract). *Fed Proc* 29:594, 1970
11. Blair E, Hickam JB: The effect of change in body position on lung volume and intrapulmonary gas mixing in normal subjects. *J Clin Invest* 34:383-389, 1955
12. Milic-Emili J, Mead J, Turner JM: Topography of esophageal pressure as a function of posture in man. *J Appl Physiol* 19:212-216, 1964
13. Agostoni E, D'Angelo E, Bonanni MV: Topography of pleural surface pressure above resting volume in relaxed animals. *J Appl Physiol* 29:297-306, 1970
14. Agostoni E, Miserocchi G: Vertical gradient of transpulmonary pressure with active and artificial lung expansion. *J Appl Physiol* 29:705-712, 1970
15. Rothstein E, Landis FB, Narodick BG: Bronchspirometry in the lateral decubitus position. *J Thorac Surg* 19:821-829, 1950
16. Björkman S: Bronchspirometrie: Eine klinische Methode, die Funktion der menschlichen Lungen getrennt und gleichzeitig zu untersuchen. *Acta Med Scand suppl* 56:1-199, 1934
17. Denlinger JK, Kallos T, Marshall BE: Pulmonary blood flow distribution in man anesthetized in the lateral position. *Anesth Analg (Cleve)* 51:260-263, 1972
18. Katori R, Amorim D, Theye RA, et al: Influence of body position on regional pulmonary arterial-venous shunts in intact dogs. *J Appl Physiol* 29:288-296, 1970
19. Hughes JMB, Glazier JB, Maloney JE, et al: Effect of lung volume on the distribution of pulmonary blood flow in man. *Resp Physiol* 4:58-72, 1968
20. Reed JH Jr, Wood EH: Effect of body position on vertical distribution of pulmonary blood flow. *J Appl Physiol* 28:303-311, 1970
